# Supplementary material for: The Response Regulator VC1795 of Vibrio Pathogenicity Island-2 Contributes to Intestinal Colonization by Vibrio cholerae
Source: MDPI journal article supplement (doi:10.3390/ijms241713523), 2023-08-31
Supplement: s1 [file s1]

Fig. S1

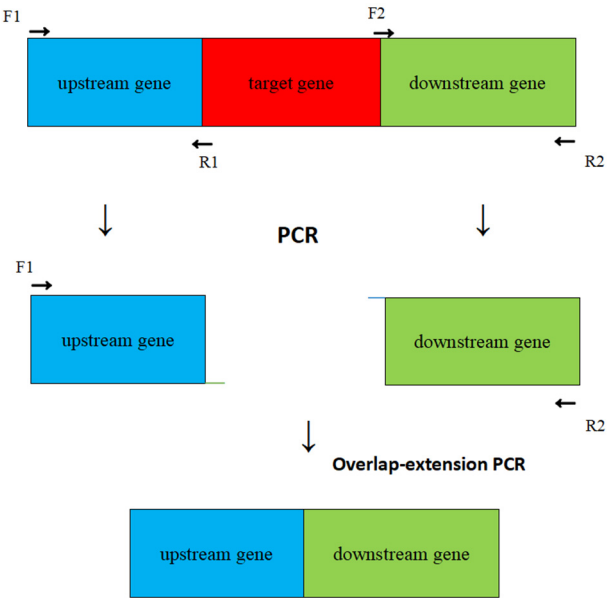

Fig. S1 Graphical process of the deletion of the target gene in this study.

Fig. S2

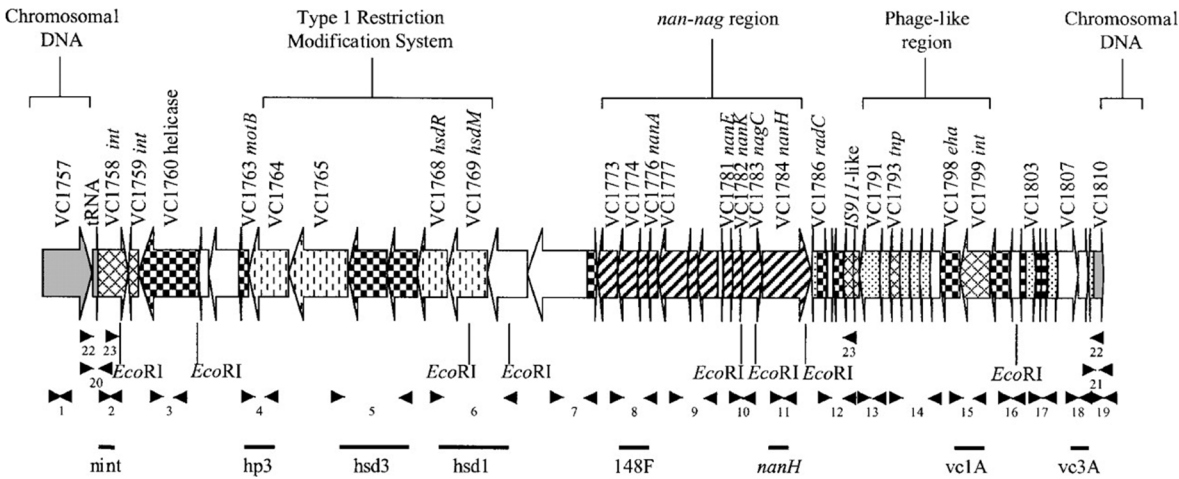

Fig. S2 Schematic representation and genetic organization of the 57.3 kb VPI-2 on the *V. cholerae* N16961 genome [1].

[1] Jermyn WS, Boyd EF. Characterization of a novel *Vibrio* pathogenicity island (VPI-2) encoding neuraminidase (*nanH*) among toxigenic *Vibrio cholerae* isolates.

Fig. S3

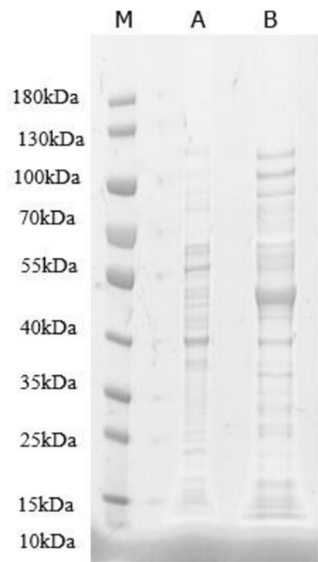

Fig. S3 The results of *VC1795* DNA pull-down assay by SDS-PAGE. M, 10~180kDa protein marker. A, the eluted protein of *VC1795* DNA pull-down. B, bacterial lysis of the whole protein.

Fig. S4

| Descriptions                                                         |                                                                                         | Graphic Summary                            | Alignments     | Taxonomy                 |             |         |            |          |                                |
|----------------------------------------------------------------------|-----------------------------------------------------------------------------------------|--------------------------------------------|----------------|--------------------------|-------------|---------|------------|----------|--------------------------------|
| Sequences producing significant alignments                           |                                                                                         |                                            |                |                          |             |         |            |          |                                |
|                                                                      |                                                                                         | Download                                   | Select columns | Show 100                 |             |         |            |          |                                |
| <input checked="" type="checkbox"/> select all 68 sequences selected |                                                                                         |                                            |                |                          |             |         |            |          |                                |
|                                                                      |                                                                                         | GenPept                                    | Graphics       | Distance tree of results |             |         |            |          |                                |
|                                                                      |                                                                                         | Multiple alignment                         |                |                          |             |         |            |          |                                |
|                                                                      |                                                                                         | MSA Viewer                                 |                |                          |             |         |            |          |                                |
|                                                                      | Description                                                                             | Scientific Name                            | Max Score      | Total Score              | Query Cover | E value | Per. Ident | Acc. Len | Accession                      |
| <input checked="" type="checkbox"/>                                  | <a href="#">Mor transcription activator family protein [Vibrio]</a>                     | <a href="#">Vibrio</a>                     | 216            | 216                      | 100%        | 2e-70   | 100.00%    | 106      | <a href="#">WP_000035502.1</a> |
| <input checked="" type="checkbox"/>                                  | <a href="#">Mor transcription activator family protein [Vibrio cholerae]</a>            | <a href="#">Vibrio cholerae</a>            | 214            | 214                      | 99%         | 9e-70   | 100.00%    | 105      | <a href="#">WP_108257508.1</a> |
| <input checked="" type="checkbox"/>                                  | <a href="#">Mor transcription activator family protein [Vibrio cholerae]</a>            | <a href="#">Vibrio cholerae</a>            | 214            | 214                      | 100%        | 1e-69   | 99.06%     | 106      | <a href="#">WP_000035501.1</a> |
| <input checked="" type="checkbox"/>                                  | <a href="#">TPA: transcriptional regulator [Vibrio cholerae]</a>                        | <a href="#">Vibrio cholerae</a>            | 198            | 198                      | 91%         | 1e-63   | 100.00%    | 97       | <a href="#">HBN6901300.1</a>   |
| <input checked="" type="checkbox"/>                                  | <a href="#">Mor transcription activator family protein [Vibrio cholerae]</a>            | <a href="#">Vibrio cholerae</a>            | 196            | 196                      | 91%         | 1e-62   | 100.00%    | 97       | <a href="#">WP_230373708.1</a> |
| <input checked="" type="checkbox"/>                                  | <a href="#">hypothetical protein VCHCUF01_2837 [Vibrio cholerae HCUF01]</a>             | <a href="#">Vibrio cholerae HCUF01</a>     | 192            | 192                      | 90%         | 2e-61   | 98.96%     | 96       | <a href="#">EGQ98281.1</a>     |
| <input checked="" type="checkbox"/>                                  | <a href="#">mor transcription activator family protein [Vibrio cholerae CP1047(20)]</a> | <a href="#">Vibrio cholerae CP1047(20)</a> | 191            | 191                      | 90%         | 1e-60   | 97.92%     | 96       | <a href="#">EJH85458.1</a>     |
| <input checked="" type="checkbox"/>                                  | <a href="#">Mor transcription activator family protein [Vibrio cholerae]</a>            | <a href="#">Vibrio cholerae</a>            | 182            | 182                      | 100%        | 4e-57   | 83.02%     | 106      | <a href="#">WP_216506085.1</a> |
| <input checked="" type="checkbox"/>                                  | <a href="#">Mor transcription activator family protein [Vibrio]</a>                     | <a href="#">Vibrio</a>                     | 180            | 180                      | 100%        | 3e-56   | 82.08%     | 106      | <a href="#">WP_000189109.1</a> |
| <input checked="" type="checkbox"/>                                  | <a href="#">Mor transcription activator family protein [Vibrio cholerae]</a>            | <a href="#">Vibrio cholerae</a>            | 179            | 179                      | 100%        | 4e-56   | 82.08%     | 106      | <a href="#">WP_199352151.1</a> |
| <input checked="" type="checkbox"/>                                  | <a href="#">Mor transcription activator family protein [Vibrio cholerae]</a>            | <a href="#">Vibrio cholerae</a>            | 179            | 179                      | 82%         | 4e-56   | 100.00%    | 87       | <a href="#">WP_053044752.1</a> |
| <input checked="" type="checkbox"/>                                  | <a href="#">Mor transcription activator family protein [Vibrio cholerae]</a>            | <a href="#">Vibrio cholerae</a>            | 178            | 178                      | 98%         | 1e-55   | 82.69%     | 105      | <a href="#">WP_108257509.1</a> |

Fig. S4 The alignment results of *VC1795* amino acid sequence in National Center for Biotechnology Information (NCBI).

**Fig. S5**

CCGCCTTCAAACAAGCCAATCTTTAAATGCCTTTTCATTAGAAGAGGCATTT  
CTTTCTGAAACGCCCTCAAATCAGTTTCTAGCCGTGATGCGAGTATTCGCTT  
GTCTAAAAAAGTTTAAATCAATCTGGTGCGATTAAACAGGGTTTAAACAT  
GGTTTCTGCACATATCAGTGCTTATATATAACTCCCACAATGCCCAGTCCCCT  
TTATTAAACAGCAACTCCTGTTAATTTAGTTATTACTGCAACGGGGATTATCT  
TGTATTGCTGTTGGGGCATATGGAGATAAGTCGGTTCTCCATTAAATGGCAA  
TACATTTGCCATCAACTTAGCGTAGCCCTATCTGCAAATTTGGGTAGGGTTA  
CGCTAGGTTCTTCGATGTCTATATAGAGGATAACG

**Fig. S5** Putative CRP binding sites (red and underlined) at the *VC1795* promoter region.

**Table S1** Bacterial strains and plasmids used in this study

| Strains or plasmids             | Genotype or relevant characteristics                                                                                             | Source         |
|---------------------------------|----------------------------------------------------------------------------------------------------------------------------------|----------------|
| <i>Vibrio cholerae</i> Strains  |                                                                                                                                  |                |
| El2382                          | Virulent strain, O1 El Tor type; PmB <sup>r</sup>                                                                                | Lab collection |
| $\Delta VC1795$                 | El2382, deletion of <i>VC1795</i> ; PmB <sup>r</sup>                                                                             | This study     |
| $\Delta VC1795::pVC1795$        | $\Delta VC1795$ containing plasmid p <i>VC1795</i> ; PmB <sup>r</sup>                                                            | This study     |
| $\Delta crp$                    | El2382, deletion of <i>crp</i> ; PmB <sup>r</sup>                                                                                | This study     |
| $\Delta cytR$                   | El2382, deletion of <i>cytR</i> ; PmB <sup>r</sup>                                                                               | This study     |
| $\Delta VC1807$                 | El2382, deletion of <i>VC1807</i> ; PmB <sup>r</sup>                                                                             | This study     |
| $\Delta VC1794$                 | El2382, deletion of <i>VC1794</i> ; PmB <sup>r</sup>                                                                             | This study     |
| <i>Escherichia coli</i> Strains |                                                                                                                                  |                |
| S17-1( $\lambda$ pir)           | <i>Tpr Smr recA thi pro rK- mK- RP4:2-Tc:Mu Km Tn7 <math>\lambda</math> pir (thi pro hsdR hsdM<sup>+</sup> recA RP4-2-Tc : :</i> | Lab collection |

|                                                         |                                                                                                         |                |
|---------------------------------------------------------|---------------------------------------------------------------------------------------------------------|----------------|
| BL21(DE3)                                               | Host strain for protein expression                                                                      | Lab collection |
| BL21/pET- <i>VC1795</i>                                 | BL21(DE3) with pET28a carrying the <i>VC1795</i> gene; Km <sup>r</sup>                                  | This study     |
| BL21/pET- <i>crp</i>                                    | BL21(DE3) with pET28a carrying the <i>crp</i> gene; Km <sup>r</sup>                                     | This study     |
| BL21/pET- <i>cytR</i>                                   | BL21(DE3) with pET28a carrying the <i>cytR</i> gene; Km <sup>r</sup>                                    | This study     |
| Plasmids                                                |                                                                                                         |                |
| pRE112                                                  | pGP704 suicide plasmid, <i>pir</i> dependent, <i>oriT</i> , <i>oriV</i> , <i>sacB</i> , Cm <sup>r</sup> | Lab collection |
| pBAD33                                                  | Arabinose inducible promoter; Cm <sup>r</sup>                                                           | Lab collection |
| pET28a                                                  | T7 expression vector; Km <sup>r</sup>                                                                   | Lab collection |
| pET- <i>VC1795</i>                                      | pET28a carrying the <i>VC1795</i> gene; Km <sup>r</sup>                                                 | This study     |
| pET- <i>crp</i>                                         | pET28a carrying the <i>crp</i> gene; Km <sup>r</sup>                                                    | This study     |
| pET- <i>cytR</i>                                        | pET28a carrying the <i>cytR</i> gene; Km <sup>r</sup>                                                   | This study     |
| $\Delta VC1795$ /pBAD33- <i>VC1795</i> -3 $\times$ FLAG | $\Delta VC1795$ containing plasmid p <i>VC1795</i> -3 $\times$ FLAG; PmB <sup>r</sup>                   | This study     |

<sup>a</sup> r = resistant.

**Table S2 Primers used in this study**

| Target genes                        | Primer sequence (5'-3')                |
|-------------------------------------|----------------------------------------|
| Primers for construction of mutants |                                        |
| $\Delta VC1795$                     | F <u>CGAGCTCCGAGTATTCGCTTGTCTAAA</u>   |
|                                     | R TCCTATCTAGTGATAACTCTCCTTACA          |
|                                     | F TCATGTAAGGCTAGATAGGAAATTAACCAT       |
|                                     | R <u>CGGGGTACCTGCCATCGACTAATTGATAC</u> |
| $\Delta crp$                        | F <u>CGGGGTACCGTTCAATGGACGACTACCT</u>  |
|                                     | R GAGACGGGTTAATAATCTCACTTCCTCTGC       |

|                |   |                                             |
|----------------|---|---------------------------------------------|
| <i>ΔcytR</i>   | F | GCAGAGGAAGGTGCCCCGATAACCCGTCTC              |
|                | R | <u>TCCCCCGGGAAGCATTAGCCAGTGAGG</u>          |
|                | F | <u>CGAGCTCTTTCGAGCTGAAGCCAATC</u>           |
|                | R | CGAAGGTGGGGTATTTTTACCCTCTTTTCTCTATC<br>G    |
|                | F | GTAAAAATACCCACCTTCGAAACCGA                  |
|                | R | <u>CGGGGTACCTCCGAGGACGACACGATAC</u>         |
| <i>ΔVC1807</i> | F | <u>CGAGCTCTTCAGGGATTGAGGAAAGC</u>           |
|                | R | GGGGAGCGCTGGACACAGGATAAGGATTTCGT            |
|                | F | TCCTGTGTCCAGCGCTCCCCTATTTTTTAT              |
|                | R | <u>CGGGGTACCGAAGCCTTAGCCAGACGAG</u>         |
| <i>ΔVC1794</i> | F | <u>CGAGCTCATGTTAGCTATAGAAAGAGCAATCC</u>     |
|                | R | CGACTGACGAGGTTAATTCCTATCTAGTTATGAC<br>GTTTT |
|                | F | GAAATTAACCTCGTCAGTCGATTATTATCTCAGT          |
|                | R | <u>CGGGGTACCTTACCAATAAACTCCACTTGACG</u>     |

Primers for construction of complemented strain

|                         |   |                                   |
|-------------------------|---|-----------------------------------|
| <i>ΔVC1795::pVC1795</i> | F | CGGGGTACCCTTTGATGATCTTGAAAGCGGT   |
|                         | R | AAAACCTGCAGTTATGACGTTTTGAATTTGCGA |

Primers for identification of plasmid

|        |   |                      |
|--------|---|----------------------|
| pRE112 | F | CACTGTTCGTCCATTTCG   |
|        | R | TTCGTCTCAGCCAATCCCT  |
| pBAD33 | F | AACAAAGCGGGACCAAAG   |
|        | R | AGAGCGTTCACCGACAAA   |
| pET28a | F | TAATACGACTCACTATAGGG |
|        | R | TGCTAGTTATTGCTCAGCGG |

# Primers for qRT-PCR

|               |   |                       |
|---------------|---|-----------------------|
| 16S rRNA      | F | CCCTTATCCTTGTTTGCC    |
|               | R | TATCGCTGCCCTCTGTAT    |
| <i>VC1795</i> | F | TCAAAGGTCGCTTGTGATTTC |
|               | R | TTGAGTTCTTCGTGCCACAG  |
| <i>VC1794</i> | F | GCCTCTGAACTTGTGGAACG  |
|               | R | TGGCGTACGCTATCTGACAA  |
| <i>VC1803</i> | F | AAATAGCTGGCCGACAACAG  |
|               | R | TCCGCTTCTACTCCCTTGTG  |
| <i>VC0575</i> | F | CGTAGGTATGCCCCATGTTC  |
|               | R | AAGAAACCCATTGTCCACCA  |
| <i>VC1325</i> | F | GATACCGGCATGTGGGATAC  |
|               | R | ATGTCGCCGGACTTAATGAG  |
| <i>VC1442</i> | F | TCTTTCTGGTGCATGGCATA  |
|               | R | GCGCTCTTGTCCAAAAAGAC  |
| <i>VC0159</i> | F | GTGGTTGCAACGGCTTTAAT  |
|               | R | ACTCGGCGAACAGCTCTTTA  |
| <i>VC1811</i> | F | ATTGCCATTTTGGTGGATGT  |
|               | R | CAAAGCCAATCCCTCGTAAA  |
| <i>tcpA</i>   | F | TGGGGATTTTCTCATTTC    |
|               | R | CTTCCTGGTGCAATGGACTT  |
| <i>tcpB</i>   | F | TACAAGCGGGAAGCTGAACT  |
|               | R | CTGCTGTGAGGCAGTTTTCA  |
| <i>tcpC</i>   | F | CTCCGCCTCAGCAAGATTAG  |

|             |   |                       |
|-------------|---|-----------------------|
|             | R | TCGGCATAACCATCATGCTA  |
| <i>tcpD</i> | F | CTGGGAGGTGGAGCCTATTT  |
|             | R | AAAAACCAGTTAGCGCTTGGT |
| <i>tcpE</i> | F | GAGGGAGTGGGCATCTATGA  |
|             | R | TGCAGCAATACCACTCGAAA  |
| <i>tcpF</i> | F | CTACGGATTCAAGGGGGAGT  |
|             | R | CAGCTAAAAGCCGAGCAGAG  |
| <i>tcpQ</i> | F | GCAGATTGCAGAACAGTCCTC |
|             | R | CCGCATTATCGAACTGAACC  |
| <i>tcpR</i> | F | CCTCATTTATCAAGGCGTCAA |
|             | R | TTCAATCAGTTGTGCATCCAA |
| <i>tcpS</i> | F | GCACCCGTTTTATCTCCTCA  |
|             | R | CGATTACCTTATTGCCCTTGG |
| <i>tcpT</i> | F | TGCTGTATTTAGCGCGAATG  |
|             | R | GTCGCTCCCGATATTTACGA  |

#### Primers for EMSA

|               |   |                           |
|---------------|---|---------------------------|
| <i>VC1795</i> | F | GGTTCTTCGATGTCTATATAGAGGA |
|               | R | GCACTTTGCTTAATGGCTTC      |
| <i>VC1794</i> | F | AACTCACTCCTAGCGCTCAAG     |
|               | R | GGTTAATTCCTATCTAGTTATGACG |
| 4.5S RNA      | F | CTGGTCCTCCCGCAACAC        |

|                             |   |                                                                                                                      |
|-----------------------------|---|----------------------------------------------------------------------------------------------------------------------|
| Primers<br>pull-down        | R | GAGACCCCAGCCACATC                                                                                                    |
|                             | F | AGCACTTTGCTTAATGGCTT                                                                                                 |
| Primers for CHIP            | R | ATGACATTTTTCTTGGTGTCATT                                                                                              |
|                             | F | CGGAGCTCATGGCACCCACTGATAATCA                                                                                         |
|                             | R | GCTCTAGATTACTATTTATCGTCGTCATCTTTGTAG<br>TC<br>GATATCATGATCTTTATAATCACCGTCATGGTCTTT<br>GT<br>AGTCTGACGTTTTGAATTTGCGAA |
|                             |   |                                                                                                                      |
| Primers for protein cloning |   |                                                                                                                      |
| CRP                         | F | <u>CGCGGATCC</u> ATGGTTCTAGGTAAACCTCA                                                                                |
|                             | R | <u>CCGCTCGAGT</u> TAGCGAGTGCCGTAAACCA                                                                                |
| CytR                        | F | <u>CGCGGATCC</u> ATGGCGACAATGAAGGATG                                                                                 |
|                             | R | <u>CCGCTCGAGT</u> TACTTCTTGCTTGGCGG                                                                                  |
| VC1795                      | F | <u>CGCGGATCC</u> ATGGCACCCACTGATAATC                                                                                 |
|                             | R | <u>CCGCTCGAG</u> ATGGTTCTAGGTAAACC                                                                                   |

---

F, forward; R, reverse.

**Table S3 Mass spectrometry protein detection results of *VC1795* DNA-pull down**

| protein | description                         | score |
|---------|-------------------------------------|-------|
| VC0395  | Response regulator                  | 377   |
| Acs     | Acetyl-coenzyme A synthetase        | 304   |
| RpsC    | 30S ribosomal protein S3            | 272   |
| SpeA    | Biosynthetic arginine decarboxylase | 257   |



|        |                                                                         |     |
|--------|-------------------------------------------------------------------------|-----|
| MalT   | HTH-type transcriptional regulator MalT                                 | 246 |
| VC1087 | Response regulator                                                      | 214 |
| GlpB   | Anaerobic glycerol-3-phosphate dehydrogenase subunit B                  | 172 |
| PheT   | Phenylalanine--tRNA ligase beta subunit                                 | 167 |
| HupA   | DNA-binding protein                                                     | 132 |
| CytR   | Bacterial regulatory s, lacI family protein                             | 104 |
| AtpD   | ATP synthase subunit                                                    | 103 |
| MenD   | 2-succinyl-5-enolpyruvyl-6-hydroxy-3-cyclohexene-1-carboxylate synthase | 102 |
| Crp    | Bacterial regulatory s, crp family protein                              | 101 |
| OmpW   | Outer membrane protein W                                                | 105 |
| GltA   | Citrate synthase                                                        | 97  |
| YeiP   | Elongation factor P-like protein                                        | 87  |
| Fur    | Ferric uptake regulation protein                                        | 85  |
| AcpP   | Acyl carrier protein                                                    | 84  |
| RplQ   | 50S ribosomal protein L17                                               | 83  |
| RplD   | 50S ribosomal protein L4                                                | 82  |
| RpsK   | 30S ribosomal protein S11                                               | 80  |
| PdxH   | Pyridoxine/pyridoxamine 5'-phosphate oxidase                            | 74  |
| CutC   | Copper homeostasis protein CutC                                         | 70  |
| ProQ   | RNA chaperone ProQ                                                      | 69  |
| SecF   | Protein-export membrane protein SecF                                    | 68  |
| UppS   | Ditrans, polycis-undecaprenyl-diphosphate synthase                      | 66  |
| HtpG   | Chaperone protein HtpG                                                  | 65  |
| Gap    | Glyceraldehyde-3-phosphate dehydrogenase                                | 60  |
| LysS   | Lysine--tRNA ligase                                                     | 60  |
| MiaB   | tRNA-2-methylthio-N(6)-dimethylallyl adenosine synthase                 | 58  |
| Gnd    | 6-phosphogluconate dehydrogenase, decarboxylating                       | 57  |
| PepT   | Peptidase T                                                             | 55  |
| MetK   | S-adenosylmethionine synthase                                           | 52  |
| Rho    | Transcription termination factor Rho                                    | 50  |
| HldE   | Bifunctional protein HldE                                               | 48  |

|      |                                                                          |    |
|------|--------------------------------------------------------------------------|----|
| VexA | MexH family multidrug efflux RND transporter periplasmic adaptor subunit | 47 |
| RplP | 50S ribosomal protein L16                                                | 46 |
| Lrp  | Leucine-responsive regulatory protein                                    | 43 |
| KatB | Catalase                                                                 | 41 |

---

**Table S4 ChIP-seq data of VC1795 transcriptional regulator from *Vibrio cholerae***

| peak name       | start   | end     | log2.fold enrichment | gene          |
|-----------------|---------|---------|----------------------|---------------|
| output_peak_51a | 1940728 | 1942078 | 1.39099              | <i>VC1794</i> |
| output_peak_47  | 1709155 | 1709510 | 1.38381              | <i>VC1596</i> |
| output_peak_52  | 1947894 | 1948242 | 1.38094              | <i>VC1803</i> |
| output_peak_26a | 674721  | 676016  | 1.36418              | <i>VC0633</i> |
| output_peak_24b | 603519  | 607217  | 1.35077              | <i>VC0575</i> |
| output_peak_22  | 516215  | 516495  | 1.32396              | <i>deoR</i>   |
| output_peak_6a  | 149790  | 150350  | 1.30049              | <i>VC0159</i> |
| output_peak_40  | 1409003 | 1409457 | 1.26130              | <i>VC1325</i> |
| output_peak_54  | 1953844 | 1954075 | 1.22993              | <i>VC1811</i> |
| output_peak_44a | 1538267 | 1539120 | 1.22675              | <i>VC1442</i> |
| output_peak_84b | 2753915 | 2754809 | 1.22675              | <i>rpmJ</i>   |
| output_peak_103 | 308442  | 308929  | 1.22675              | <i>infC</i>   |
| output_peak_72a | 2345944 | 2347145 | 1.22625              | <i>flgB</i>   |
| output_peak_68  | 2253835 | 2254126 | 1.2234               | <i>gltA</i>   |
| output_peak_81  | 2564984 | 2565228 | 1.22135              | <i>VC2397</i> |
| output_peak_92  | 2956379 | 2956838 | 1.21848              | <i>VC2772</i> |
| output_peak_38d | 1158288 | 1160499 | 1.21753              | <i>VC1091</i> |
| output_peak_19a | 382590  | 383274  | 1.2167               | <i>VC0364</i> |
| output_peak_29  | 678090  | 678310  | 1.2167               | <i>VC0637</i> |
| output_peak_38c | 1158288 | 1160499 | 1.21335              | <i>VC1091</i> |
| output_peak_21  | 436048  | 436287  | 1.21004              | <i>VC0410</i> |

---

---

|                 |         |         |         |                |
|-----------------|---------|---------|---------|----------------|
| output_peak_46a | 1566851 | 1567997 | 1.20888 | <i>VC1457</i>  |
| output_peak_5   | 105688  | 106044  | 1.20824 | <i>VC0108</i>  |
| output_peak_49  | 1730796 | 1731500 | 1.20309 | <i>VC1618</i>  |
| output_peak_56b | 1976387 | 1977680 | 1.19994 | <i>VC1835</i>  |
| output_peak_62  | 2067222 | 2067503 | 1.19994 | <i>VC1917</i>  |
| output_peak_108 | 689489  | 689973  | 1.19968 | <i>glpK</i>    |
| output_peak_35  | 1021588 | 1021850 | 1.19962 | <i>VC0957</i>  |
| output_peak_46b | 1566851 | 1567997 | 1.19958 | <i>VC1456</i>  |
| output_peak_56a | 1976387 | 1977680 | 1.19639 | <i>tolB</i>    |
| output_peak_72c | 2345944 | 2347145 | 1.19458 | <i>flgD</i>    |
| output_peak_20  | 434524  | 434899  | 1.18825 | <i>VC0408</i>  |
| output_peak_95b | 61524   | 62132   | 1.18825 | <i>VCA0053</i> |
| output_peak_97  | 151093  | 151468  | 1.18739 | <i>glpQ</i>    |
| output_peak_10a | 252982  | 253805  | 1.18653 | <i>VC0247</i>  |
| output_peak_28b | 677157  | 677716  | 1.18653 | <i>VC0635</i>  |
| output_peak_58  | 2049913 | 2050190 | 1.18653 | <i>nhaB</i>    |
| output_peak_90a | 2926432 | 2926771 | 1.18653 | <i>VC2751</i>  |
| output_peak_4   | 75933   | 76172   | 1.18468 | <i>VC0076</i>  |
| output_peak_16  | 339850  | 340090  | 1.18318 | <i>rplL</i>    |
| output_peak_56c | 1976387 | 1977680 | 1.18318 | <i>VC1834</i>  |
| output_peak_34  | 897179  | 897465  | 1.17983 | <i>VC0835</i>  |
| output_peak_31a | 682640  | 683195  | 1.17979 | <i>secG</i>    |
| output_peak_55  | 1975847 | 1976119 | 1.17842 | <i>VC1834</i>  |
| output_peak_70  | 2335813 | 2336038 | 1.17666 | <i>VC2188</i>  |
| output_peak_28a | 677157  | 677716  | 1.17648 | <i>rrmJ</i>    |
| output_peak_79b | 2513760 | 2514210 | 1.17648 | <i>VC2357</i>  |
| output_peak_27  | 676350  | 676651  | 1.17313 | <i>greA</i>    |
| output_peak_80  | 2564162 | 2564394 | 1.16603 | <i>lpxC</i>    |
| output_peak_13  | 266064  | 266401  | 1.15972 | <i>VC0260</i>  |
| output_peak_25a | 607507  | 608289  | 1.15972 | <i>VC0578</i>  |
| output_peak_63  | 2157734 | 2158112 | 1.15568 | <i>VC2005</i>  |

|                 |         |         |         |                |
|-----------------|---------|---------|---------|----------------|
| output_peak_95a | 61524   | 62132   | 1.15152 | <i>VCA0053</i> |
| output_peak_90b | 2926432 | 2926771 | 1.14929 | <i>VC2750</i>  |
| output_peak_37  | 1079204 | 1079503 | 1.14553 | <i>VC1009</i>  |
| output_peak_88  | 2910002 | 2910290 | 1.14022 | <i>VC2738</i>  |

---
